# Supplementary material for: Synthesis, physicochemical characterization, toxicity and efficacy of a PEG conjugate and a hybrid PEG conjugate nanoparticle formulation of the antibiotic moxifloxacin
Source: Royal Society of Chemistry journal article supplement (doi:10.1039/c9ra10872f), 2020-01-01
Supplement: c9ra10872f1.pdf [file c9ra10872f1.pdf]

## Synthesis, physicochemical characterization, toxicity and efficacy of a PEG conjugate and a hybrid PEG conjugate nanoparticle formulation of the antibiotic moxifloxacin

Lesego L. Tshweu,<sup>a,b</sup> Mohamed Shemis<sup>c</sup>, Aya Abdelghany<sup>c</sup>, Abdullah Gouda<sup>c</sup>, Lynne A. Pilcher<sup>b</sup>, Nicole R.S. Sibuyi<sup>d</sup>, Mervin Meyer<sup>d</sup>, Admire Dube<sup>e</sup>, Mohammed O. Balogun,<sup>\*a</sup>

Double emulsion was used as a method of choice, since it allows various solvents to be used, and both hydrophilic and hydrophobic drugs can be nanoencapsulated using the method (1,2). Mox is a relatively hydrophilic drug. The encapsulation of hydrophilic drug in polymeric nanoparticles using single emulsion is problematic due to their escape to the external aqueous phase.

Lactose is mostly used as an excipient in the preparation of spray-dried nanoparticles. Our team have optimized the production of nanoparticles using different concentrations of lactose in the formulation. 5% lactose was found to give optimum results. The formulation was optimized using Taguchi L<sub>8</sub> method (3).

Figure 1 shows the average particle size of the prepared conjugates and nanoparticles. Spherical nanoparticles were obtained as shown in Figure 2.

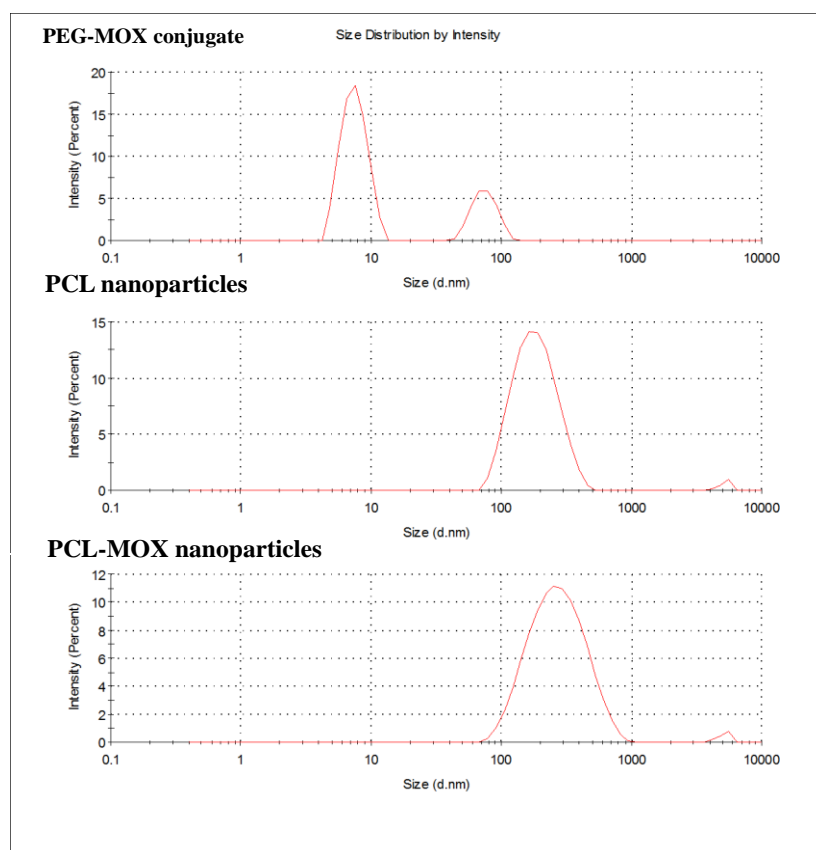

**Figure 1** : Average particle size of PEG-Mox conjugate, PCL NPs and PCL(PEG-Mox) NPs.

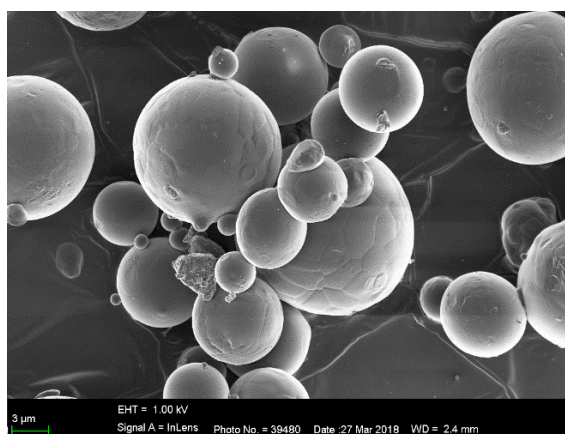

**Figure 2** SEM image of PCL(PEG-Mox) NPs

The MIC table was left out because the sample of interest [i.e. PCL (PEG-Mox)-NPs] did not show anti-bacterial activity in the micro-dilution assay (Table S1).

Table S1: MIC of samples against pathogenic bacteria

| Bacterial Strains    | MIC ( $\mu\text{g/mL}$ ) |         |                   |      |
|----------------------|--------------------------|---------|-------------------|------|
|                      | Mox                      | PEG-Mox | PCL-(PEG-Mox) NPs | NPs  |
| <i>P. aeruginosa</i> | 50                       | 50      | >100              | >100 |
| <i>E. coli</i>       | >100                     | >100    | >100              | >100 |
| <i>K. pneumoniae</i> | >100                     | >100    | >100              | >100 |
| <i>S. aureus</i>     | 100                      | 25      | >100              | >100 |
| MRSA                 | >100                     | 100     | >100              | >100 |

## References

- [1] Tshweu L, Katata L, Kalombo L, Swai H. Nanoencapsulation of water-soluble drug, lamivudine, using a double emulsion spray-drying technique for improving HIV treatment. *Journal of Nanoparticle Research* 2013; **15**(11): p. 2040.
- [2] Tshweu, L., Katata, L., Kalombo, L., Chiappetta, D., Hocht, C., Sosnik, A., Swai, H., 2013. Enhanced oral bioavailability of the antiretroviral efavirenz encapsulated in poly(epsilon-caprolactone) nanoparticles by a spray-drying method. *Nanomedicine* 0, 1–13.
- [3] Katata, L., Tshweu, L., Naidoo, S., Kalombo, L., Swai, H., 2012. Design and formulation

of nano-sized spray dried efavirenz-part I: Influence of formulation parameters. J.  
Nanoparticle Res. 14. <https://doi.org/10.1007/s11051-012-1247-0>
